# Supplementary material for: How climate change skeptics (try to) spread their ideas: Using computational methods to assess the resonance among skeptics’ and legacy media
Source: PubMed Central journal article supplement (PMC7535043; doi:10.1371/journal.pone.0240089), 2020-10-05
Supplement: pone.0240089.s001.pdf [file pone.0240089.s001.pdf]

## S1 Appendix

Starting points for the snowball-sampling of websites. Actors are from the climate skeptical counter-movement in Germany

| <b>Actor</b>                                       | <b>Start URL</b>                                                                                                                |
|----------------------------------------------------|---------------------------------------------------------------------------------------------------------------------------------|
| Analyse+Aktion                                     | <a href="http://astrologieklassisch.wordpress.com/tag/klimawandel">http://astrologieklassisch.wordpress.com/tag/klimawandel</a> |
| EIKE - Europäisches Institut für Klima und Energie | <a href="http://www.eike-klima-energie.eu">http://www.eike-klima-energie.eu</a>                                                 |
| Klimaüberraschung                                  | <a href="http://www.klima-ueberraschung.de">http://www.klima-ueberraschung.de</a>                                               |
| Klimaskeptiker                                     | <a href="http://www.klimaskeptiker.info">http://www.klimaskeptiker.info</a>                                                     |
