# Supplementary material for: How climate change skeptics (try to) spread their ideas: Using computational methods to assess the resonance among skeptics’ and legacy media
Source: PubMed Central journal article supplement (PMC7535043; doi:10.1371/journal.pone.0240089), 2020-10-05
Supplement: pone.0240089.s002.pdf [file pone.0240089.s002.pdf]

## S2 Appendix

List of German legacy media

| <b>Newspaper/magazine</b>                   | <b>Conservative</b> | <b>Number of articles in sample</b> |
|---------------------------------------------|---------------------|-------------------------------------|
| Bild                                        | x                   | 33                                  |
| Bild am Sonntag                             | x                   | 15                                  |
| Der Spiegel                                 |                     | 88                                  |
| Die Welt                                    | x                   | 347                                 |
| Die Zeit                                    |                     | 175                                 |
| Frankfurter Allgemeine Zeitung              | x                   | 622                                 |
| FAZ am Sonntag                              | x                   | 101                                 |
| Financial Times Deutschland (until 12/2012) | x                   | 47                                  |
| Focus                                       | x                   | 43                                  |
| Frankfurter Rundschau                       |                     | 466                                 |
| Handelsblatt                                | x                   | 172                                 |
| Stern                                       |                     | 40                                  |
| Süddeutsche Zeitung                         |                     | 1,225                               |
| Taz, die Tageszeitung                       |                     | 622                                 |
| Welt am Sonntag                             | x                   | 115                                 |
