# Supplementary material for: How climate change skeptics (try to) spread their ideas: Using computational methods to assess the resonance among skeptics’ and legacy media
Source: PubMed Central journal article supplement (PMC7535043; doi:10.1371/journal.pone.0240089), 2020-10-05
Supplement: pone.0240089.s003.pdf [file pone.0240089.s003.pdf]

## S3 Appendix

Topic labels and top words

| <b>Label</b>                          | <b>Top words</b>                                                                               |
|---------------------------------------|------------------------------------------------------------------------------------------------|
| Climate science conspiracy            | wissenschaft, klima, unterlag, herzland, wissenschaftl, institut, peer, arbeit, mensch, falsch |
| Climate science conspiracy            | e-mail, freitas, papier-, wissenschaft, mann, klima, mannschaft, versuch, sorg, geschicht      |
| Climate science skepticism            | prof, jahr, bitt, ipcc, co2, wissenschaft, global, klimawandel, klima, erwarm                  |
| Climategate                           | wissenschaft, tagebuch, freitas, aktion, papi, hinweis, rezension, klima, phil, person         |
| Denial of weather consequences        | klima, co2, ansteig, erhoehen,, verander, erwarm, global, mensch, wissenschaft, wett           |
| Doubting climate science consensus    | klima, wissenschaft, global, erwarm, verander, ipcc, wissenschaftl, bericht, polit, forschung  |
| Energy production                     | energi, wind, leistung, vereinigt, regier, polit, land, wirtschaft, europa, kost               |
| Environmental regulations             | pflanz, kohlenstoff, mensch, kohl, umwelt, epa, jahr, emission, welt, zustand                  |
| Environmentalism                      | mensch, natur, bericht, vereinigt, klima, konigreich, umgeb, leb, beispiel, auswirk            |
| German economy/consumption            | jahr, deutsch, klimawandel, deutschland, gross, prozent, land, energiew, europa, hoh           |
| Greenhouse gas effect                 | atmosphar, temperatur, co2, oberflach, erhoht, strahlung, erd, energ, luft, ansteig            |
| Measuring climate change              | zeigt, temperatur, dat, jahr, erwarm, modell, bedeut, global, trend, zahl                      |
| Solar activity                        | solar-, klima, sonn, erd, zyklus, aktivitat, wolk, kosmisch, strahl, planet                    |
| Suppression of climate change dissent | wissenschaft, klima, seeland, aufzeichn, temperatur, niwa, verander, position, bemerk, debatt  |
| Trend skepticism                      | jahr, eis, erhebt, meer, ansteig, erhoehen, global, erwarm, wett, temperatur                   |
